# Supplementary material for: Ice crystal characterization in cirrus clouds: a sun-tracking camera system and automated detection algorithm for halo displays
Source: Copernicus journal article supplement (doi:10.5194/amt-10-2499-2017), 2017-07-17
Supplement: Supplementary file 1 [file amt-10-2499-2017-supplement.zip]

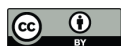

## *Supplement of*

# **Ice crystal characterization in cirrus clouds: a sun-tracking camera system and automated detection algorithm for halo displays**

**Linda Forster et al.**

*Correspondence to:* Linda Forster ([linda.forster@physik.lmu.de](mailto:linda.forster@physik.lmu.de))

- [amt-10-2499-2017-supplement-title-page.pdf](#)
- [HaloCamMIM\\_20140512\\_135235.jpg](#)

The copyright of individual parts of the supplement might differ from the CC BY 3.0 License.
