# Supplementary material for: Ice crystal characterization in cirrus clouds: a sun-tracking camera system and automated detection algorithm for halo displays
Source: Copernicus journal article supplement (doi:10.5194/amt-10-2499-2017), 2017-07-17
Supplement: Supplementary file 2 [file amt-10-2499-2017-supplement.zip]

Archive with 2 entries (2 files):
- HaloCamMIM_20140512_135235.jpg
- amt-10-2499-2017-supplement-title-page.pdf
